# Supplementary material
Source: Research Square preprint supplement (doi:10.21203/rs.3.rs-9284951/v1)
Supplement: Supplementary file 1 [file 551623f842cbf3a1102cef8f.xlsx]

## Sheet: PRISMA_2020
Section	Item #	Topic	PRISMA 2020 Checklist Item	Location in Manuscript
TITLE	1	Title	Identify the report as a systematic review.	Title page
ABSTRACT	2	Abstract	See the PRISMA 2020 for Abstracts checklist.	p. 2
INTRODUCTION	3	Rationale	Describe the rationale for the review in the context of existing knowledge.	Introduction, para 1-2
INTRODUCTION	4	Objectives	Provide an explicit statement of the objective(s) or question(s) the review addresses.	Introduction, para 3
METHODS	5	Eligibility criteria	Specify the inclusion and exclusion criteria for the review.	Methods: Eligibility criteria
METHODS	6	Information sources	Specify all databases, registers, websites, organisations, reference lists and other sources searched.	Methods: Information sources
METHODS	7	Search strategy	Present the full search strategies for all databases, registers and websites, including any filters and limits used.	Supplementary Appendix A
METHODS	8	Selection process	Specify the methods used to decide whether a study met the inclusion criteria.	Methods: Study selection
METHODS	9	Data collection process	Specify the methods used to collect data from reports.	Methods: Data extraction
METHODS	10a	Data items (outcomes)	List and define all outcomes for which data were sought.	Methods: Statistical analysis
METHODS	10b	Data items (other)	List and define all other variables for which data were sought.	Methods: Data extraction
METHODS	11	Study risk of bias	Specify the methods used to assess risk of bias in included studies.	Methods: Risk of bias
METHODS	12	Effect measures	Specify for each outcome the effect measure(s) used in the synthesis or presentation.	Methods: Statistical analysis
METHODS	13a	Synthesis methods (eligibility)	Describe the processes used to decide which studies were eligible for each synthesis.	Methods: Statistical analysis
METHODS	13b	Synthesis methods (tabulation)	Describe any methods required to prepare the data for synthesis.	Methods: Statistical analysis
METHODS	13c	Synthesis methods (statistical)	Describe any methods used to tabulate or visually display results of individual studies and syntheses.	Methods: Statistical analysis; Figures 2-4
METHODS	13d	Synthesis methods (heterogeneity)	Describe any methods used to synthesise results and provide a rationale for the choice(s).	Methods: Statistical analysis
METHODS	13e	Synthesis methods (sensitivity)	Describe any methods used to explore possible causes of heterogeneity among study results.	Methods: Statistical analysis (subgroup, meta-regression)
METHODS	13f	Sensitivity analyses	Describe any sensitivity analyses conducted to assess robustness of the synthesised results.	Methods: Statistical analysis (leave-one-out, HKSJ)
METHODS	14	Reporting bias assessment	Describe any methods used to assess risk of bias due to missing results in a synthesis.	Methods: Statistical analysis (funnel plot)
METHODS	15	Certainty assessment	Describe any methods used to assess certainty in the body of evidence for an outcome.	Methods: Statistical analysis (GRADE)
RESULTS	16a	Study selection	Describe the results of the search and selection process with flow diagram.	Results: Study selection; Fig. 1
RESULTS	16b	Study selection (excluded)	Cite studies that might appear to meet the inclusion criteria, but which were excluded.	Supplementary Appendix B
RESULTS	17	Study characteristics	Cite each included study and present its characteristics.	Results: Study characteristics; Table 1
RESULTS	18	Risk of bias in studies	Present assessments of risk of bias for each included study.	Results: Risk of bias; Fig. 3; Supp. Appendix C
RESULTS	19	Results of individual studies	For all outcomes, present for each study the summary statistics and effect estimates.	Results: Risk factor synthesis; Supp. Appendix D
RESULTS	20a	Results of syntheses	For each synthesis, briefly summarise the characteristics and risk of bias among contributing studies.	Results: Pooled incidence; Table 1
RESULTS	20b	Results of syntheses (statistical)	Present results of all statistical syntheses conducted.	Results: Pooled incidence, Subgroup analyses
RESULTS	20c	Results of syntheses (heterogeneity)	Present results of all investigations of possible causes of heterogeneity.	Results: Subgroup and sensitivity analyses
RESULTS	20d	Results of syntheses (sensitivity)	Present results of all sensitivity analyses conducted to assess robustness.	Results: Subgroup and sensitivity analyses
RESULTS	21	Reporting biases	Present assessments of risk of bias due to missing results for each synthesis.	Results (funnel plot noted with k<10 caveat)
RESULTS	22	Certainty of evidence	Present assessments of certainty in the body of evidence for each outcome.	Results: Certainty of evidence; Table 2
DISCUSSION	23a	Discussion	Provide a general interpretation of the results in the context of other evidence.	Discussion, para 1-3
DISCUSSION	23b	Discussion (limitations)	Discuss any limitations of the evidence included in the review.	Discussion: Strengths and limitations
DISCUSSION	23c	Discussion (review limitations)	Discuss any limitations of the review processes used.	Discussion: Strengths and limitations
DISCUSSION	23d	Discussion (implications)	Discuss implications of the results for practice, policy, and future research.	Discussion: Implications
OTHER	24	Registration and protocol	Provide registration information for the review.	Methods: Protocol and registration
OTHER	25	Support	Describe sources of financial or non-financial support for the review.	Title page (to be added)
OTHER	26	Competing interests	Declare any competing interests of review authors.	Title page (to be added)
OTHER	27	Availability of data	Report which of data, analytic code, and other materials related to the review are available.	To be added
