# Supplementary material
Source: Research Square preprint supplement (doi:10.21203/rs.3.rs-9284951/v1)
Supplement: Supplementary file 2 [file 614eea051f7e8a9c1b6bf6f0.xlsx]

## Sheet: Study_Characteristics
Study ID	First Author	Year	Journal	Country	Data Source	Study Design	Study Period	Total N	Metastatic N	Mean Age	Male %	Primary Tumors (top 3)	Spinal Level	Surgical Approach	Follow-up	Funding	COI
Schairer 2014	Schairer WW	2014	Spine	USA	Single-center (UCSF)	Retrospective cohort	2005-2011	197	164	57.2±13.2	54.8%	Breast 17%, Kidney 15%, Prostate 15%	C 25%, T 68%, L 21%, S 4%	Mixed	1 year min	None	Yes
Lau 2016	Lau D	2016	J Neurosurg Spine	USA	Single-center (UCSF)	Retrospective cohort	2005-2013	181	118	—	—	—	—	Mixed	90 days	None	Yes
Abu-Bonsrah 2017	Abu-Bonsrah N	2017	World Neurosurg	USA	Single-center (JHU)	Retrospective cohort	2003-2013	159	159	—	—	Lung 22%, Breast 19.5%, Kidney 16.4%	—	—	1 year+	None	Yes
Elsamadicy 2018	Elsamadicy AA	2018	J Spine Surg	USA	Single-center (Duke)	Retrospective cohort	2012-2016	135	30	55.7±14.2	48.9%	—	Thoracic majority	Posterior	30 days	None	No
Kumar N 2021a	Kumar N	2021	Eur Spine J	Singapore	Single-center (NUH)	Retrospective cohort	2005-2016	272	272	58.7±12.5	56.3%	Lung 28%, Breast 15%, Prostate 8%	T 55%, L 30%, C 15%	Posterior 75%, Anterior 15%, Combined 10%	2 years	None	No
Elsamadicy 2021	Elsamadicy AA	2021	Spine	USA	NRD 2013-2015	Retrospective cohort (national DB)	2013-2015	4423	4423	—	—	—	—	Decompression ± fusion	90 days	None	Yes
Patel 2021	Patel J	2021	World Neurosurg	USA	Single-center (JHU cancer)	Retrospective cohort	—	345	345	59.4±11.7	56.2%	Lung 14.2%, Hemato 13.6%, Breast 13.3%	C 15%, T 60%, L 23%, S 7%	Posterior 88%, Anterior 12%	30d (mean 13.9 mo)	None	Yes
Shahrestani 2021	Shahrestani S	2021	World Neurosurg	USA	NRD 2016-2017	Retrospective cohort (PSM)	2016-2017	1071	~1005 (93.5%)	61.7/62.5	62.9/65%	—	Lumbar only	Anterior 11%, Posterior 72%, Combined 17%	90 days	None	Yes
Elsamadicy 2022	Elsamadicy AA	2022	Global Spine J	USA	NRD 2016-2018	Retrospective cohort (ML)	2016-2018	4346	4346	—	—	—	—	Decompression ± fusion	30 days	None	Yes
Chanbour 2023a	Chanbour H	2023	Spine	USA	Single-center (Vanderbilt)	Retrospective case-control	2010-2021	357	357	—	—	—	—	—	3 months (mean 538d)	Nuvasive/Stryker	Yes
Larkin 2023	Larkin CJ	2023	Clin Neurol Neurosurg	USA	Single-center (Northwestern)	Retrospective cohort	—	263	263	—	54% male	—	T 54%, Multi 16%, L 14%, C 14%	Posterior 87%	—	None	No
Noh 2024	Noh SH	2024	World Neurosurg	S. Korea	Korean HIRA national DB	Retrospective cohort (national)	2012-2019	15815	15815	—	—	—	—	Surgery vs RT	90 days	Ajou Univ grant	No
Pojskic 2024	Pojskić M	2024	Cancers	Germany	Single-center (Marburg)	Retrospective cohort	2018-2022	175	175	67.15 median	40.6% F	Lung 18%, Prostate 18%, Breast 16%	—	Decomp 24%, Decomp+instr 76%	Until death/last F/U	None	No
Tsai 2025	Tsai PJ	2025	Circ J	Taiwan (USA NRD)	NRD 2016-2020	Retrospective cohort (national)	2016-2020	2706	2706	63.6±0.2	53%	—	—	Decomp/fusion/PVA/multiple	90 days	Chang Gung grant	No

## Sheet: Readmission_Outcomes
Study ID	N (met)	30d Readmission n (%)	90d Readmission n (%)	1yr Readmission n (%)	Readmission Definition	Top Causes	Timeframe	Pooling?
Schairer 2014	164	28/197 (16.8%)	—	37.8% (KM)	Unplanned readmission	Recurrent 33%, Surgical 23%, Medical 43%	30d + 1yr	Yes (30d)
Lau 2016	118	—	14/118 (11.9%)	—	Any readmission	—	90d	Yes (90d)
Abu-Bonsrah 2017	159	22/159 (13.8%)	—	75/159 (47.2%)	Any readmission	Oncologic 33.7%, Surgical 26.7%, Medical 36.7%	30d + 1yr	Yes (30d)
Elsamadicy 2018	30	3/30 (~10%)	—	—	Unplanned readmission	Weakness, sensory deficits, pain	30d	Yes (30d) ⚠️ small n
Kumar N 2021a	272	47/272 (17.2%)	Reported	Reported	Unplanned hospital readmission	ECOG, CCI, lung primary, postop LOS	30d/90d/1yr/2yr	Yes (30d)
Elsamadicy 2021	4423	1068/4423 (24.1%)	589/4423 (13.3% add'l)	—	Unplanned readmission	Sepsis, postop infection, GU complications	30d + 90d	Yes (30d + 90d)
Patel 2021	345	42/345 (12.2%)	—	—	Unplanned readmission	Wound infection 14.2%, VTE 14.2%, bowel 9.5%	30d	Yes (30d)
Shahrestani 2021	~1005	Frail 12.9% / Nonfrail 15.2%	Frail 42.0% / Nonfrail 38.3%	—	Readmission (NRD)	—	30d + 90d	Yes (30d by group)
Elsamadicy 2022	4346	ML model (rate not explicit)	—	—	Unplanned readmission	HFRS frailty features	30d	🟡 Verify rate
Chanbour 2023a	357	—	64/357 (21.9% at 3mo)	—	Unplanned readmission	Postop complications 68.8%	3 months	Yes (90d ≈ 3mo)
Larkin 2023	263	Reported	—	—	Post-treatment readmission	No sig diff by SES	30d	Yes if rate extractable
Noh 2024	13974	—	Reported	—	90-day readmission	RT, age 30-69, male, CCI >1	90d	Yes (90d) ⚠️ incl RT
Pojskic 2024	175	RFS analysis	—	—	Readmission-free survival	ECOG, fracture, tumor type	RFS	🟡 Convert to rate
Tsai 2025	2706	455/2706 (17.5%)†	907/2706 (34.3%)†	—	All-cause readmission	VTE→readmission aOR 2.06	30d + 90d	Yes (30d + 90d)

## Sheet: Risk_Factors
Study ID	Risk Factor	Measure	Effect Size	95% CI	p-value	Analysis	Notes
Schairer 2014	Operative time >10hr	HR	3.64	1.89-7.00	<0.001	MV Cox	Strongest surgical predictor
Schairer 2014	Normal ambulation (preop)	HR	0.49	0.27-0.90	0.022	MV Cox	Protective
Schairer 2014	Diabetes	HR	7.15	2.57-19.85	<0.001	MV Cox
Schairer 2014	Depression	HR	2.51	1.15-5.47	0.021	MV Cox
Schairer 2014	Obesity	HR	5.08	1.29-20.00	0.020	MV Cox
Schairer 2014	Hypothyroidism	HR	2.57	1.03-6.40	0.042	MV Cox
Schairer 2014	Pulm circulatory disorder	HR	15.23	3.03-76.59	0.001	MV Cox	Wide CI
Abu-Bonsrah 2017	Age >60 years	—	—	—	sig	MV	🔴 Need exact OR/CI from full text
Abu-Bonsrah 2017	Prior spinal radiation	—	—	—	sig	MV	🔴 Need exact OR/CI from full text
Patel 2021	Modified CCI (per point)	OR	1.25	1.03-1.52	0.03	MV logistic	30d readmission
Patel 2021	Preop radiotherapy	OR	1.96	0.98-3.90	0.06	MV logistic	Trend
Patel 2021	LOS (per day)	OR	1.02	1.00-1.05	0.09	MV logistic	Trend
Patel 2021	CCI — reoperation	OR	1.72	1.29-2.28	<0.01	MV logistic	30d reop
Elsamadicy 2021	Hypertension	—	—	—	sig	MV weighted	🔴 Need exact OR/CI
Elsamadicy 2021	Renal failure	—	—	—	sig	MV weighted	🔴 Need exact OR/CI
Elsamadicy 2021	RA/collagen disease	—	—	—	sig	MV weighted	90d readmission
Elsamadicy 2021	Coagulopathy	—	—	—	sig	MV weighted	90d readmission
Shahrestani 2021	Frailty (JHACG) — 30d	OR	0.84	—	0.47	PSM + OR	NS
Shahrestani 2021	Frailty (JHACG) — 90d	OR	1.07	—	0.74	PSM + OR	NS
Chanbour 2023a	Postop complications	OR	1.38	1.25-1.52	<0.001	MV logistic	3mo readmission
Chanbour 2023a	Readmission → OS	HR	1.75	1.28-2.39	<0.001	MV Cox	Impact on survival
Kumar N 2021a	ECOG >1	—	—	—	sig	MV	🔴 Need exact OR/CI
Kumar N 2021a	CCI >7	—	—	—	sig	MV	🔴 Need exact OR/CI
Kumar N 2021a	Lung primary	—	—	—	sig	MV	🔴 Need exact OR/CI
Kumar N 2021a	Preop Hb <12	—	—	—	sig	MV	ReAFS predictor
Noh 2024	RT vs surgery	—	—	—	sig	MV	🔴 Need exact OR/CI
Noh 2024	Age 30-69	—	—	—	sig	MV	🔴 Need exact OR/CI
Noh 2024	Male sex	—	—	—	sig	MV	🔴 Need exact OR/CI
Noh 2024	CCI >1	—	—	—	sig	MV	🔴 Need exact OR/CI
Tsai 2025	VTE → 30d readmission	aOR	2.06	1.33-3.19	0.001	MV logistic	VTE as exposure
Tsai 2025	VTE → 90d readmission	aOR	1.66	1.10-2.50	0.015	MV logistic	VTE as exposure
Tsai 2025	CCI ≥4 → VTE	aOR	3.11	1.60-6.04	0.001	MV logistic	Predictor of VTE
Tsai 2025	Delayed surgery → VTE	aOR	1.88	1.27-2.79	0.002	MV logistic	Predictor of VTE
Larkin 2023	Male sex → ↓ complications	Coeff	-0.14	—	0.032	MV regression
Larkin 2023	Age → ↓ readmission	Coeff	-0.0089	—	0.034	MV regression	Per year
Pojskic 2024	ECOG ≥2	—	—	—	sig	MV	🔴 RFS analysis — need exact HR
Pojskic 2024	Pathological fracture	—	—	—	sig	MV	🔴 RFS analysis — need exact HR
Pojskic 2024	Primary tumor type	—	—	—	sig	MV	🔴 Favorable vs unfavorable

## Sheet: NOS_Assessment
Study ID	S1 Represent.	S2 Non-exposed	S3 Exposure	S4 Outcome absent	C1 Main factor	C2 Additional	O1 Outcome assess	O2 Follow-up	O3 Adequacy	Total (/9)	Quality
Schairer 2014	★	★	★	★	★	★	★	★	★	9	Good
Lau 2016	★	★	★	★	★	—	★	★	★	8	Good
Abu-Bonsrah 2017	★	★	★	★	★	★	★	★	★	9	Good
Elsamadicy 2018	★	—	★	★	—	—	★	★	—	5	Fair
Kumar N 2021a	★	★	★	★	★	★	★	★	★	9	Good
Elsamadicy 2021	★	★	★	★	★	★	★	★	—	8	Good
Patel 2021	★	★	★	★	★	★	★	★	★	9	Good
Shahrestani 2021	★	★	★	★	★	★	★	★	—	8	Good
Elsamadicy 2022	★	★	★	★	★	★	★	★	—	8	Good
Chanbour 2023a	★	★	★	★	★	★	★	★	★	9	Good
Larkin 2023	★	★	★	★	★	★	★	—	—	7	Good
Noh 2024	★	★	★	★	★	★	★	★	—	8	Good
Pojskic 2024	★	★	★	★	★	—	★	★	★	8	Good
Tsai 2025	★	★	★	★	★	★	★	★	—	8	Good
