# Supplementary material
Source: Research Square preprint supplement (doi:10.21203/rs.3.rs-9284951/v1)
Supplement: Supplementary file 3 [file b3f63f65d9c8067fd41c91fb.xlsx]

## Sheet: Risk_Factors_Complete
Study ID	Risk Factor	Measure	Effect Size	95% CI Lower	95% CI Upper	p-value	Analysis	Notes
Schairer 2014	Operative time >10hr	HR	3.64	1.89	7	<0.001	MV Cox	🟢
Schairer 2014	Normal ambulation (preop)	HR	0.49	0.27	0.9	0.022	MV Cox	🟢 Protective
Schairer 2014	Diabetes	HR	7.15	2.57	19.85	<0.001	MV Cox	🟢
Schairer 2014	Depression	HR	2.51	1.15	5.47	0.021	MV Cox	🟢
Schairer 2014	Obesity	HR	5.08	1.29	20	0.020	MV Cox	🟢
Schairer 2014	Hypothyroidism	HR	2.57	1.03	6.4	0.042	MV Cox	🟢
Schairer 2014	Pulmonary circulatory disorder	HR	15.23	3.03	76.59	0.001	MV Cox	🟢 Wide CI
Abu-Bonsrah 2017	Age >60 years	HR	1.68	1.05	2.69	0.028	MV Cox	🟢 VERIFIED
Abu-Bonsrah 2017	Prior spine radiation	HR	1.71	1.07	2.73	0.022	MV Cox	🟢 VERIFIED
Patel 2021	Modified CCI (per point)	OR	1.25	1.03	1.52	0.03	MV logistic	🟢 30d readmission
Patel 2021	Preop radiotherapy	OR	1.96	0.98	3.9	0.06	MV logistic	🟢 Trend
Patel 2021	LOS (per day)	OR	1.02	1	1.05	0.09	MV logistic	🟢 Trend
Patel 2021	CCI (per point) — reoperation	OR	1.72	1.29	2.28	<0.01	MV logistic	🟢 30d reop
Kumar N 2021a	ECOG >1	OR	2.233	0.976	5.106	0.057	MV logistic	🟢 VERIFIED borderline
Kumar N 2021a	CCI >7	OR	2.538	1.223	5.267	<0.01	MV logistic	🟢 VERIFIED
Kumar N 2021a	Lung primary tumor	OR	3.093	1.192	8.029	0.02	MV logistic	🟢 VERIFIED
Elsamadicy 2021	Hypertension	OR	1.45	1.15	1.82	0.002	MV weighted	🟢 VERIFIED 30d
Elsamadicy 2021	Renal failure	OR	1.53	1.06	2.23	0.025	MV weighted	🟢 VERIFIED 30d
Shahrestani 2021	Frailty (JHACG) — 30d	OR	0.84			0.47	PSM + OR	🟢 NS
Shahrestani 2021	Frailty (JHACG) — 90d	OR	1.07			0.74	PSM + OR	🟢 NS
Chanbour 2023a	Postop complications	OR	1.38	1.25	1.52	<0.001	MV logistic	🟢 3mo readmission
Chanbour 2023a	Readmission → OS	HR	1.75	1.28	2.39	<0.001	MV Cox	🟢 Impact on survival
Noh 2024	Radiotherapy (vs surgery)	OR	1.92	1.72	2.14	<0.0001	MV logistic	🟢 VERIFIED 90d
Noh 2024	Age 30-49	OR	1.47	1.22	1.77	<0.0001	MV logistic	🟢 VERIFIED 90d
Noh 2024	CCI = 2	OR	1.55	1.35	1.77	<0.0001	MV logistic	🟢 VERIFIED 90d
Noh 2024	CCI = 2 (adjusted)	aOR	1.6	1.4	1.84	<0.0001	MV logistic	🟢 adjusted
Noh 2024	CCI = 3	OR	2.47	2.2	2.77	<0.0001	MV logistic	🟢 VERIFIED 90d
Noh 2024	CCI = 3 (adjusted)	aOR	2.24	2	2.52	<0.0001	MV logistic	🟢 adjusted
Pojskic 2024	ECOG 0-1 → deterioration	OR	5.585	1.113	28.031	0.037	MV logistic	🟢 RFS-related
Pojskic 2024	ECOG 0-1 → no change	OR	8.4	1.48	47.667	0.016	MV logistic	🟢 RFS-related
Pojskic 2024	Tomita <7 → no change	OR	2.462	0.266	22.772	0.427	MV logistic	🟢 NS
Pojskic 2024	Frankel A-C → improvement	OR	3.267	0.815	13.095	0.095	MV logistic	🟢 Trend
Tsai 2025	VTE → 30d readmission	aOR	2.06	1.33	3.19	0.001	MV logistic	🟢
Tsai 2025	VTE → 90d readmission	aOR	1.66	1.1	2.5	0.015	MV logistic	🟢
Tsai 2025	CCI ≥4 → VTE	aOR	3.11	1.6	6.04	0.001	MV logistic	🟢
Tsai 2025	Delayed surgery → VTE	aOR	1.88	1.27	2.79	0.002	MV logistic	🟢
Larkin 2023	Age → ↓ readmission	Coeff	-0.0089			0.034	MV regression	🟢

## Sheet: Pooling_30d_Incidence
Study ID	Events (n)	Total (N)	Rate (%)	Timeframe	Data Source
Schairer 2014	28	197	14.2	30-day	🟢 from PDF (mets=164, but rate from total 197)
Abu-Bonsrah 2017	22	159	13.8	30-day	🟢 from abstract
Elsamadicy 2018	3	30	10	30-day	🟢 from PDF (~10%)
Kumar N 2021a	47	272	17.3	30-day	🟢 from abstract
Elsamadicy 2021	1068	4423	24.1	30-day	🟢 from abstract
Patel 2021	42	345	12.2	30-day	🟢 from PDF
Tsai 2025	455	2706	16.8	30-day	🟢 from abstract (excl deaths)
