# Supplementary material
Source: Research Square preprint supplement (doi:10.21203/rs.3.rs-9284951/v1)
Supplement: Supplementary file 4 [file b8192be3c4baccb7fc81d53b.xlsx]

## Sheet: Sheet1
Study	Reason for Exclusion
Thommen 2024	Wrong outcome — no readmission data reported; primary endpoint was mortality/hospice
Christensen 2021	Insufficient data — MSCC surgery n=74; readmission mentioned but no rate or risk factor data extractable
Randell 2023	Wrong population — general lumbar spine surgery; excluded metastatic cancer from adjusted models
Ansari 2022	Wrong framework — extradural spinal tumours with thrombocytopenia as exposure; no metastatic-specific readmission analysis
Kazim 2022	Mixed cohort — n=4662 spinal tumours (43.3% metastatic); unable to separate metastatic subgroup readmission data
Karhade 2016	Mixed cohort — spinal tumours including both primary and metastatic; no metastatic-specific readmission data extractable
Kumar N 2021b	Overlapping cohort — Singapore NUH n=266; ReAFS concept using same cohort as Kumar 2021a (Eur Spine J, n=272)
Chanbour 2023b	Overlapping subset — cervical spine subset (n=61) of Chanbour 2023a (n=357); inclusion would double-count
